# Supplementary material for: Endothelial Yes-Associated Protein 1 Promotes Astrocyte Proliferation and Maturation via Cytoplasmic Leukemia Inhibitory Factor Secretion in Oxygen-Induced Retinopathy
Source: PubMed Central journal article supplement — Invest Ophthalmol Vis Sci. 2020 Apr 9;61(4):1. doi: 10.1167/iovs.61.4.1 (PMC7401846; doi:10.1167/iovs.61.4.1), 2020-04-09
Supplement: iovs-61-4-1_s001.pdf [file iovs-61-4-1_s001.pdf]

**a**

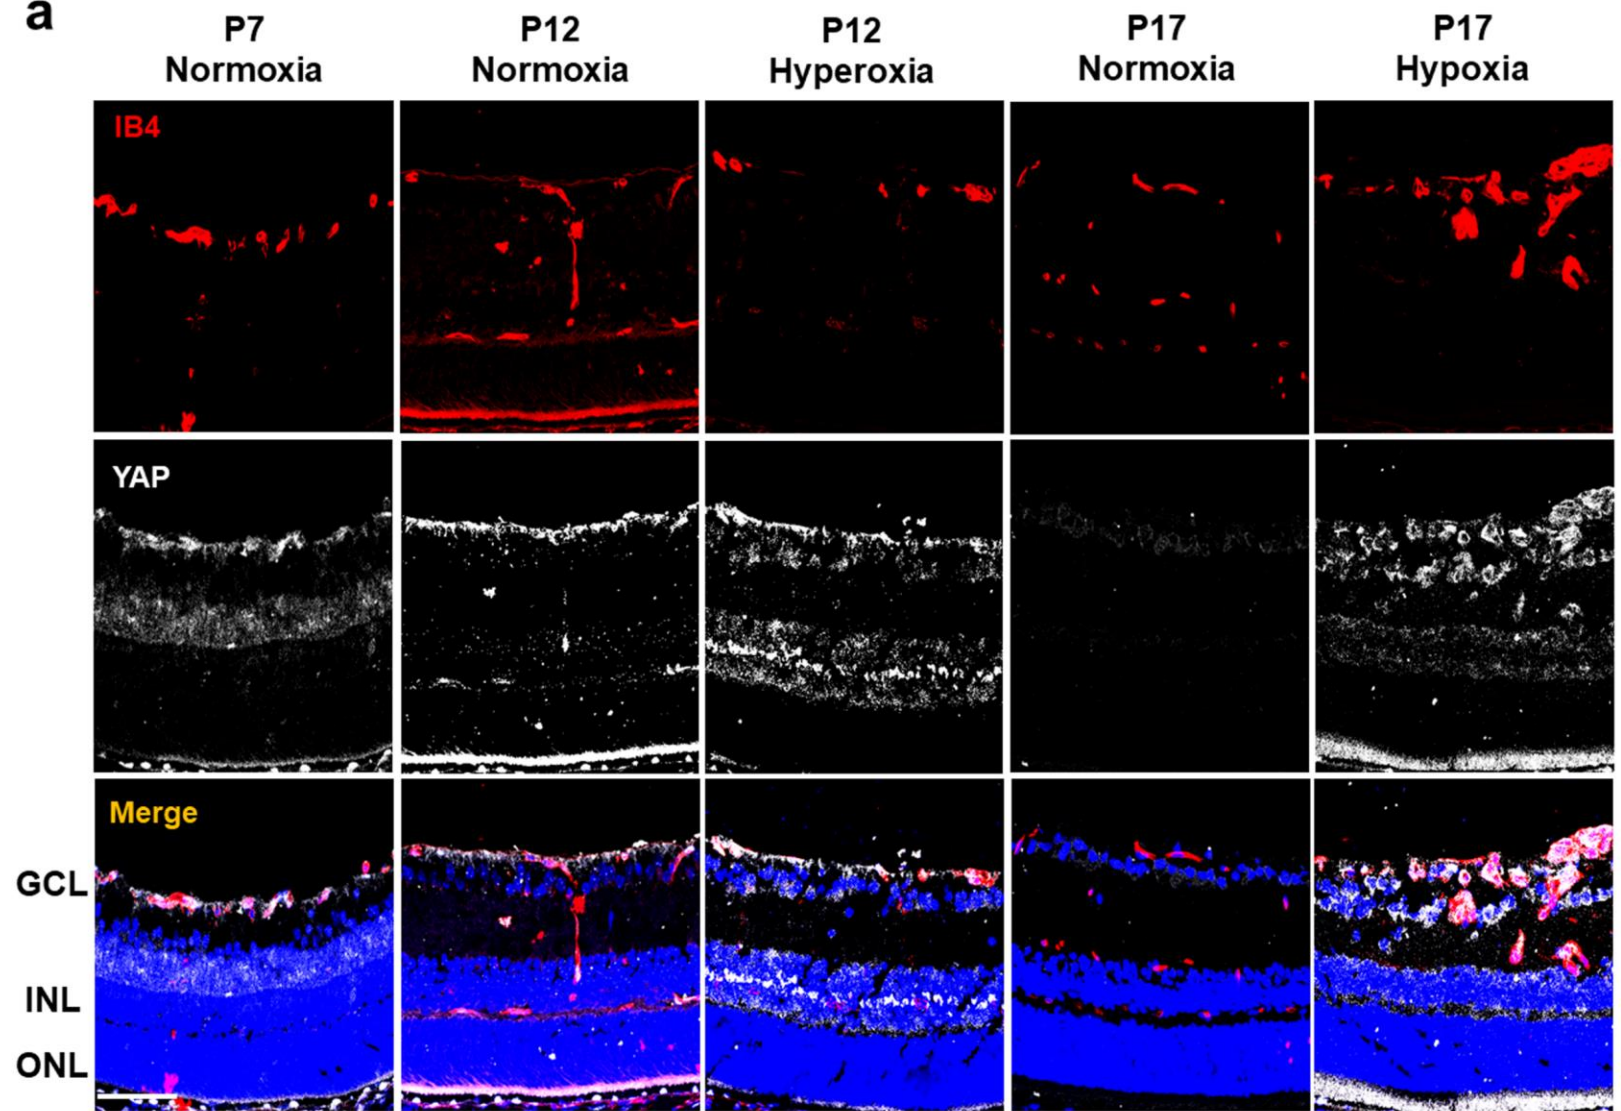

## Figure S1

(a) Confocal immunofluorescence images of retinal cross-sections stained for IB4 (red) and YAP (gray) during development and in oxygen-induced retinopathy. YAP was mainly colocalized with IB4 on the superficial vascular plexus and to a lesser extent in the inner nuclear layer in normoxia phases (P7, P12, P17) and in both the hyperoxia and hypoxia phases (n=3). Bar = 20  $\mu\text{m}$ .
