# Supplementary material for: Endothelial Yes-Associated Protein 1 Promotes Astrocyte Proliferation and Maturation via Cytoplasmic Leukemia Inhibitory Factor Secretion in Oxygen-Induced Retinopathy
Source: PubMed Central journal article supplement — Invest Ophthalmol Vis Sci. 2020 Apr 9;61(4):1. doi: 10.1167/iovs.61.4.1 (PMC7401846; doi:10.1167/iovs.61.4.1), 2020-04-09
Supplement: iovs-61-4-1_s002.pdf [file iovs-61-4-1_s002.pdf]

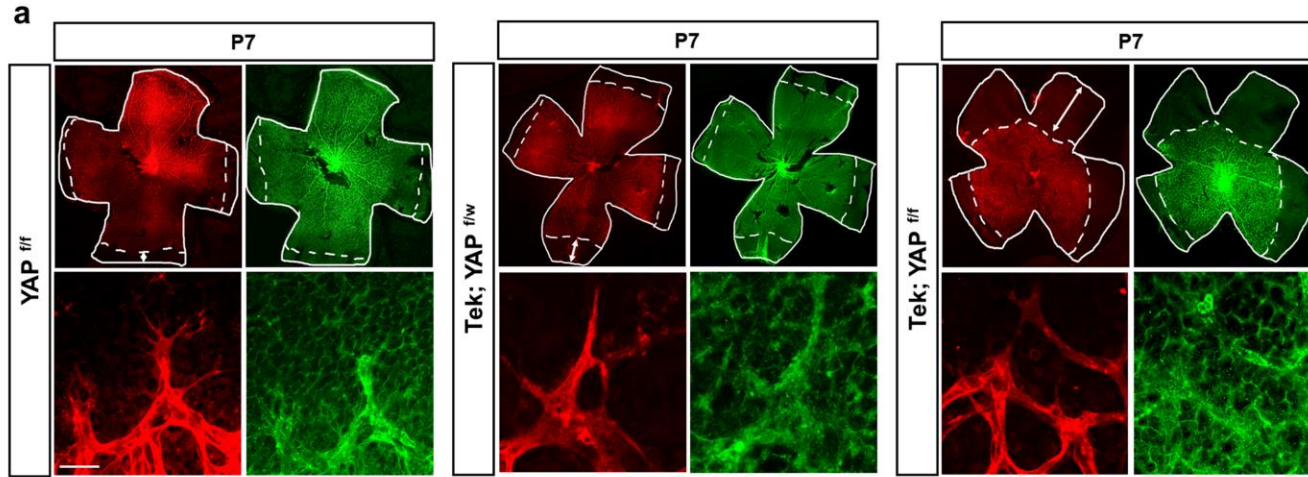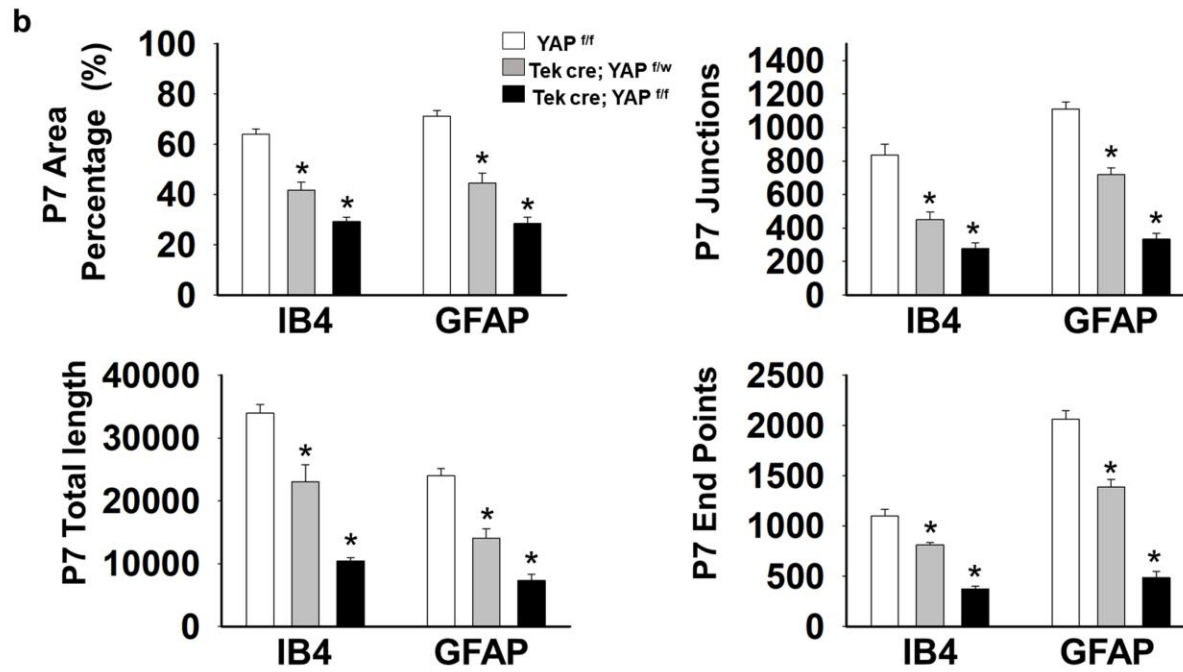

## Figure S2

(a) Composite immunofluorescence of whole-mount  $YAP^{f/f}$ ,  $YAP^{f/w};Tek\ Cre$  and  $YAP^{f/f};Tek\ Cre$  retinas, which were stained by GFAP (green) and IB4 (red) to visualize the astrocytic and vascular network at P7. The white arrows show the distance between the retina equator and the edge of vessel/astrocyte networks. (b) Quantification of the vascular area, total vessel length, junctions and endpoints showed a significant difference between YAP knockout mice and control littermates. (n=3; \*,  $p<0.05$ ). Bar = 100  $\mu\text{m}$ .
