# Supplementary material for: Endothelial Yes-Associated Protein 1 Promotes Astrocyte Proliferation and Maturation via Cytoplasmic Leukemia Inhibitory Factor Secretion in Oxygen-Induced Retinopathy
Source: PubMed Central journal article supplement — Invest Ophthalmol Vis Sci. 2020 Apr 9;61(4):1. doi: 10.1167/iovs.61.4.1 (PMC7401846; doi:10.1167/iovs.61.4.1), 2020-04-09
Supplement: iovs-61-4-1_s003.pdf [file iovs-61-4-1_s003.pdf]

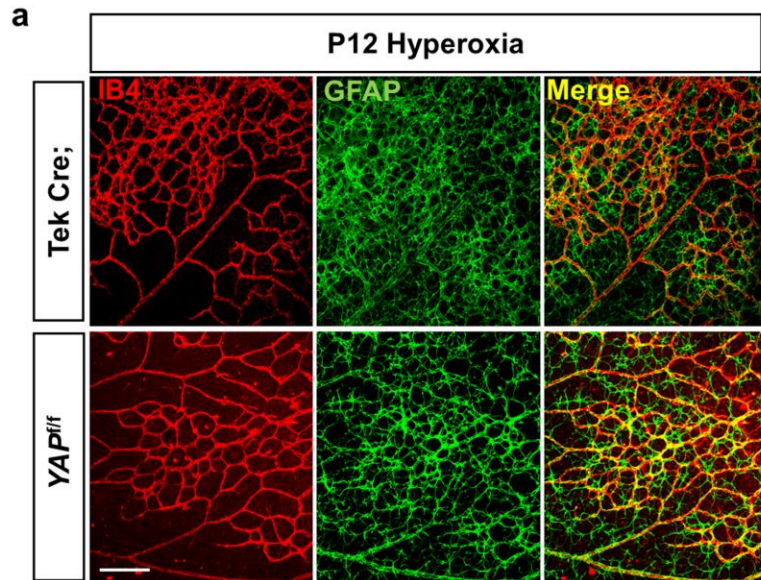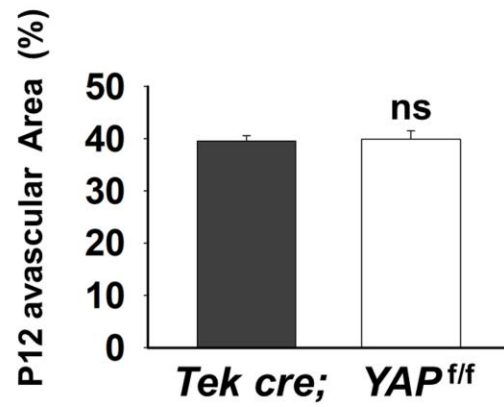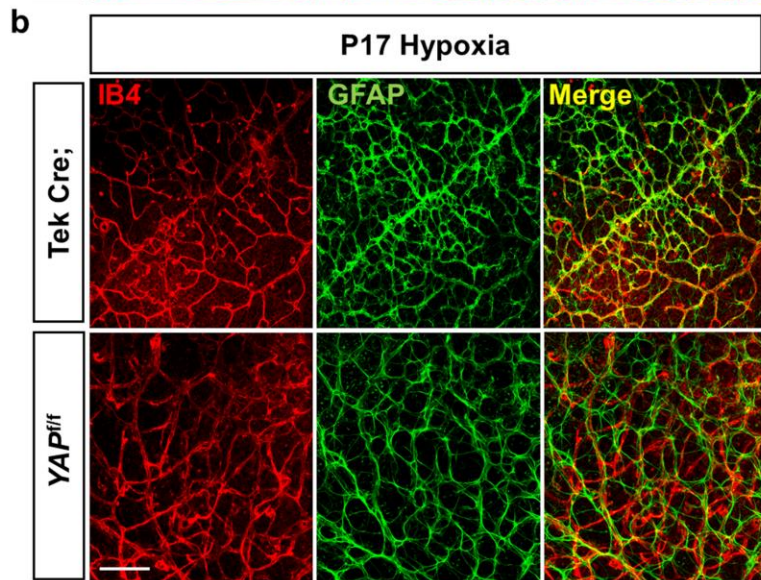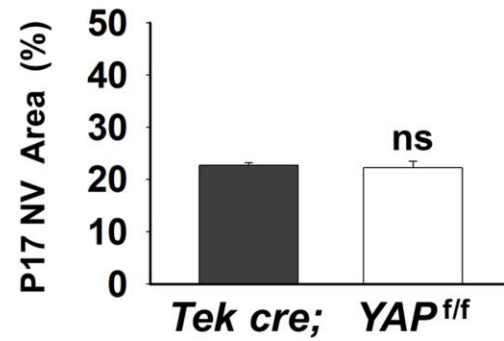

### Figure S3

Immunofluorescence of whole-mount Tek Cre and YAP<sup>f/f</sup> retinas in ROP mice, which were stained by GFAP (green) and IB4 (red).

(a) There was no significant difference in avascular area percentage between Tek Cre and YAP<sup>f/f</sup> mice under hyperoxic conditions. (b)

At P17, there was no significant difference in the neovascular area percentage between Tek Cre and YAP<sup>f/f</sup> mice under hypoxic conditions. (n=3; ns, p>0.05;). Bar = 50  $\mu$ m.
