# Supplementary material for: Endothelial Yes-Associated Protein 1 Promotes Astrocyte Proliferation and Maturation via Cytoplasmic Leukemia Inhibitory Factor Secretion in Oxygen-Induced Retinopathy
Source: PubMed Central journal article supplement — Invest Ophthalmol Vis Sci. 2020 Apr 9;61(4):1. doi: 10.1167/iovs.61.4.1 (PMC7401846; doi:10.1167/iovs.61.4.1), 2020-04-09
Supplement: iovs-61-4-1_s004.pdf [file iovs-61-4-1_s004.pdf]

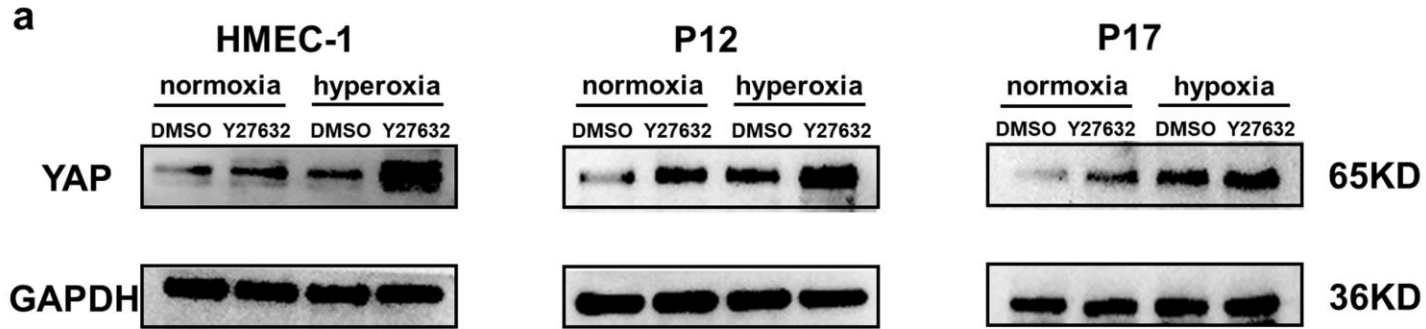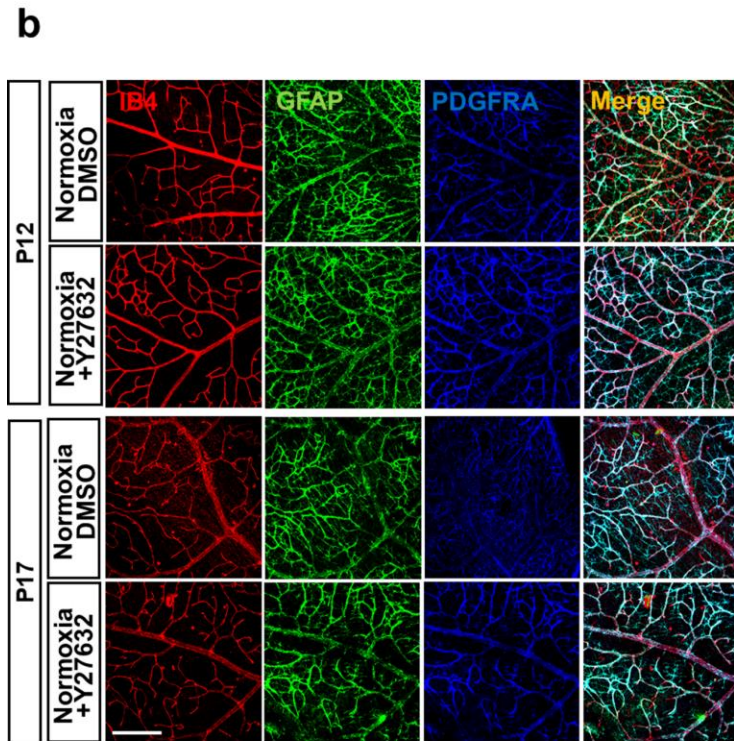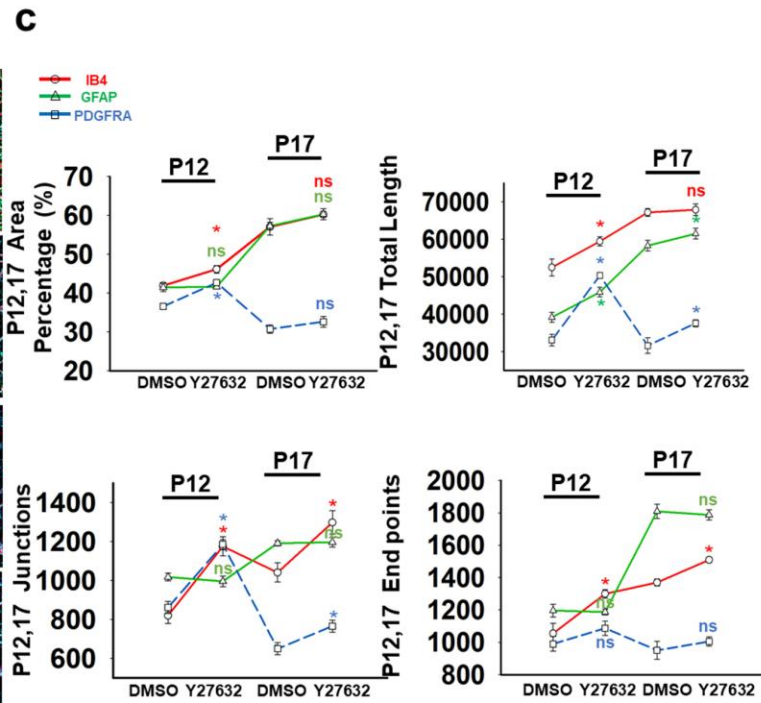

## Figure S4

(a) Western blot analysis of total YAP in HMEC-1 and the OIR model after Y27632 treatment, showing increased YAP. (b) Immunofluorescence analysis of IB4-labeled blood vessels and the GFAP-labeled or PDGFRA-labeled astrocytic network in the retinal flat mounts of P12 and P17 mice with DMSO or Y27632 injection in normoxia. (c) Quantification of the vascular and astrocytic area, total length, junctions and endpoints showed differences between the DMSO and Y27632 groups. (n=3; ns,  $p>0.05$ ; \*,  $p<0.05$ ). Bar = 50  $\mu\text{m}$ .
